# Supplementary material for: Predicting extreme sub-hourly precipitation intensification based on temperature shifts
Source: Copernicus journal article supplement (doi:10.5194/hess-28-375-2024), 2024-01-31
Supplement: Supplementary file 1 [file hess-28-375-2024-supplement.pdf]

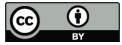

*Supplement of*

## **Predicting extreme sub-hourly precipitation intensification based on temperature shifts**

**Francesco Marra et al.**

*Correspondence to:* Francesco Marra ([francesco.marra@unipd.it](mailto:francesco.marra@unipd.it)) and Nadav Peleg ([nadav.peleg@unil.ch](mailto:nadav.peleg@unil.ch))

The copyright of individual parts of the supplement might differ from the article licence.

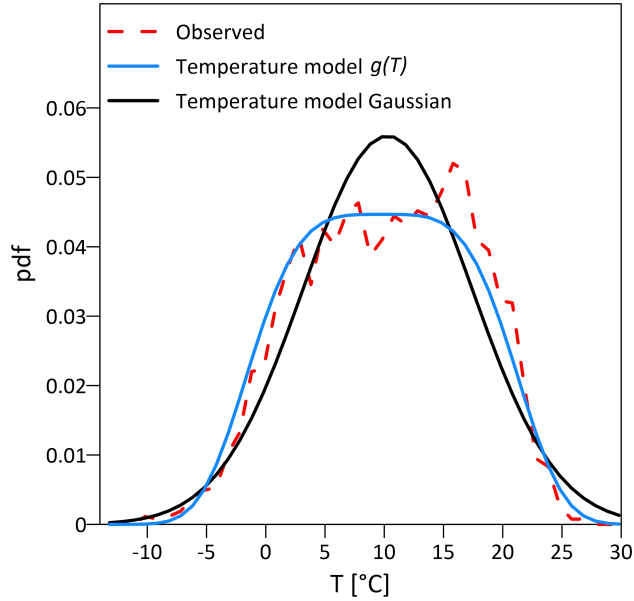

**Figure S1.** Empirical probability density of the average temperatures observed during the 24 hours preceding the 10-minute peak precipitation intensities (dashed red) and the estimated Generalized Gaussian temperature model  $g(T)$  (solid blue) – as in Fig. 2b. A black line represents the estimated Normal (Gaussian) temperature model.

**Table S1.** Location of the climate stations used in the case study. Coordinates are in Swiss projections (LV95).

| Name          | Lon [m] | Lat [m] | Elevation [m] |
|---------------|---------|---------|---------------|
| Aadorf        | 2710518 | 1259824 | 539           |
| Adelboden     | 2609372 | 1148939 | 1321          |
| Aigle         | 2560404 | 1130713 | 381           |
| Altdorf       | 2690181 | 1193564 | 438           |
| Chasseral     | 2570845 | 1220158 | 1594          |
| Lugano        | 2717874 | 1095883 | 273           |
| Piz Corvatsch | 2783156 | 1143524 | 3294          |
| Säntis        | 2744188 | 1234920 | 2501          |

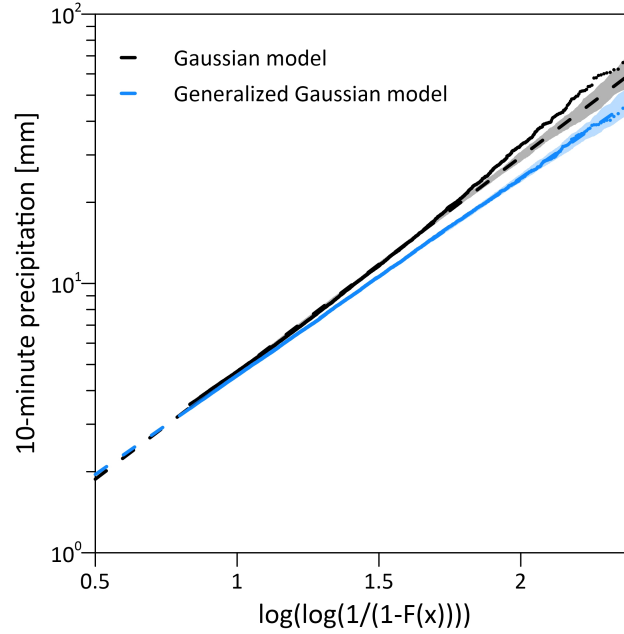

**Figure S2.** Example of empirical parent distributions of the event magnitude  $F(x)$  emerging from the combination of the Weibull model  $W(x;T)$  in Fig. 2a with two temperature models, namely the Generalized Gaussian temperature model  $g(T)$  (blue line here and in Fig. S1) and the Gaussian temperature model (black line here and in Fig. S1), which has a heavier right tail. The shaded areas show the 5-95th sampling confidence intervals from Weibull tails fitted to the models; the black dots are not likely samples from a Weibull tail. The samples shown here consist of  $2 \cdot 10^5$  points.

**Table S2.** Projections of changes in mean temperature  $\mu$  [ $^{\circ}\text{C}$ ], the standard deviation of temperature  $\sigma$ , and the occurrence of annual precipitation events  $n$  from 10 climate models obtained from the official CH2018 climate change projections of Switzerland. The projections are for the end of the century (2080-2099) in comparison with the reference period of 1981-2020, for the RCP8.5 emission scenario.

| Climate model        | Aadorf |          |      | Adelboden |          |      | Aigle  |          |      | Altdorf |          |      | Chasseral |          |      | Lugano |          |      | Piz    |          |      | Säntis |          |      |
|----------------------|--------|----------|------|-----------|----------|------|--------|----------|------|---------|----------|------|-----------|----------|------|--------|----------|------|--------|----------|------|--------|----------|------|
|                      | $\mu+$ | $\sigma$ | $n$  | $\mu+$    | $\sigma$ | $n$  | $\mu+$ | $\sigma$ | $n$  | $\mu+$  | $\sigma$ | $n$  | $\mu+$    | $\sigma$ | $n$  | $\mu+$ | $\sigma$ | $n$  | $\mu+$ | $\sigma$ | $n$  | $\mu+$ | $\sigma$ | $n$  |
| SMHI-RCA_MPIESM      | 2.8    | 0.99     | 0.96 | 4.4       | 1.29     | 1.03 | 2.9    | 1.07     | 0.97 | 4.1     | 1.20     | 1.03 | 3.1       | 1.04     | 0.95 | 2.6    | 1.06     | 1.00 | 4.2    | 1.37     | 1.03 | 3.5    | 0.99     | 0.96 |
| SMHI-RCA_IPSL        | 3.2    | 1.01     | 0.93 | 5.5       | 1.39     | 0.96 | 3.2    | 1.15     | 0.89 | 5.3     | 1.32     | 0.99 | 3.5       | 1.06     | 0.89 | 2.9    | 1.06     | 0.94 | 5.5    | 1.47     | 0.96 | 3.8    | 1.03     | 0.92 |
| SMHI-RCA_HADGEM      | 3.7    | 1.01     | 0.94 | 6.4       | 1.41     | 0.98 | 4.1    | 1.13     | 0.92 | 5.5     | 1.32     | 1.03 | 4.2       | 1.08     | 0.90 | 3.8    | 1.05     | 0.93 | 6.5    | 1.56     | 1.01 | 4.1    | 1.08     | 0.94 |
| SMHI-RCA_ECEARTH     | 3.6    | 1.01     | 0.93 | 5.0       | 1.31     | 0.98 | 3.7    | 1.15     | 0.90 | 4.8     | 1.28     | 0.99 | 4.1       | 1.07     | 0.91 | 3.4    | 1.06     | 0.92 | 4.7    | 1.34     | 0.98 | 4.1    | 1.06     | 0.96 |
| MPICSC-REMO2_MPIESM  | 2.0    | 0.97     | 1.01 | 3.0       | 1.07     | 0.96 | 1.6    | 1.03     | 1.03 | 2.5     | 1.07     | 0.98 | 2.6       | 1.05     | 1.00 | 2.2    | 1.04     | 0.96 | 3.2    | 1.12     | 0.95 | 2.5    | 1.02     | 1.02 |
| MPICSC-REMO1_MPIESM  | 2.1    | 0.91     | 1.00 | 2.7       | 1.03     | 0.97 | 1.7    | 0.99     | 1.03 | 2.4     | 1.02     | 0.99 | 2.5       | 0.97     | 0.98 | 2.3    | 1.00     | 0.98 | 3.0    | 1.09     | 0.95 | 2.3    | 0.96     | 1.00 |
| DMI-HIRHAM_ECEARTH   | 2.7    | 1.04     | 0.97 | 2.8       | 1.07     | 0.96 | 2.3    | 1.07     | 0.96 | 2.8     | 1.13     | 0.99 | 2.8       | 1.08     | 0.96 | 3.0    | 1.10     | 1.01 | 2.8    | 1.07     | 0.95 | 3.0    | 1.06     | 0.97 |
| CLMCOM-CCLM4_MPIESM  | 2.2    | 0.94     | 0.93 | 2.5       | 1.01     | 0.93 | 1.8    | 0.99     | 0.92 | 2.1     | 1.02     | 0.93 | 2.3       | 0.98     | 0.90 | 1.5    | 1.02     | 0.89 | 2.6    | 1.00     | 0.92 | 2.6    | 0.98     | 0.92 |
| CLMCOM-CCLM4_HADGEM  | 3.0    | 1.00     | 0.84 | 3.1       | 1.01     | 0.82 | 2.4    | 0.99     | 0.78 | 2.5     | 1.04     | 0.81 | 3.8       | 1.11     | 0.83 | 2.4    | 1.03     | 0.74 | 3.7    | 1.04     | 0.85 | 3.5    | 1.09     | 0.82 |
| CLMCOM-CCLM4_ECEARTH | 2.7    | 0.96     | 0.91 | 3.2       | 1.02     | 0.89 | 2.3    | 1.00     | 0.86 | 2.6     | 1.03     | 0.90 | 2.9       | 1.02     | 0.86 | 2.1    | 1.04     | 0.81 | 3.3    | 1.03     | 0.90 | 3.1    | 1.01     | 0.91 |

**Table S3.** Detail information of the CH2018 climate models presented in Table S2. The header indicates the model chains by general circulation model (GCM), initial condition (init), and the nested regional climate model (RCM).

| GCM               | init    | RCM                            | Model name in Table S2                   |
|-------------------|---------|--------------------------------|------------------------------------------|
| ICHEC-EC-EARTH    | r3i1p1  | DMI-HIRHAM5                    | DMI-HIRHAM_ECEARTH                       |
|                   | r12i1p1 | CLMcom-CCLM4-8-17<br>SMHI-RCA4 | CLMCOM-CCLM4_ECEARTH<br>SMHI-RCA_ECEARTH |
| MOHC-HadGEM2-ES   | r1i1p1  | CLMcom-CCLM4-8-17<br>SMHI-RCA4 | CLMCOM-CCLM4_HADGEM<br>SMHI-RCA_HADGEM   |
|                   |         | CLMcom-CCLM4-8-17              | CLMCOM-CCLM4_MPIESM                      |
| MPI-M-MPI-ESM-LR  | r1i1p1  | MPI-CSC-REM2009<br>SMHI-RCA4   | MPICSC-REMO1_MPIESM<br>SMHI-RCA_MPIESM   |
|                   |         | r2i1p1                         | MPI-CSC-REM2009                          |
| IPSL-IPSL-CM5A-MR | r1i1p1  | SMHI-RCA4                      | SMHI-RCA_IPSL                            |

**Table S4.** Model parameters for the eight stations.

| Name      | $\lambda_0$ | $\alpha$ | $\kappa_0$ | b     |
|-----------|-------------|----------|------------|-------|
| Aadorf    | 0.313       | 0.111    | 0.865      | 0     |
| Adelboden | 0.073       | 0.222    | 0.516      | 0.026 |
| Aigle     | 0.207       | 0.122    | 1.043      | 0     |
| Altdorf   | 0.106       | 0.144    | 0.931      | 0     |
| Chasseral | 0.455       | 0.127    | 0.742      | 0.019 |
| Lugano    | 0.855       | 0.084    | 1.113      | 0     |
| Piz       | 0.942       | 0.109    | 1.143      | 0.032 |
| Säntis    | 1.143       | 0.135    | 0.915      | 0.034 |

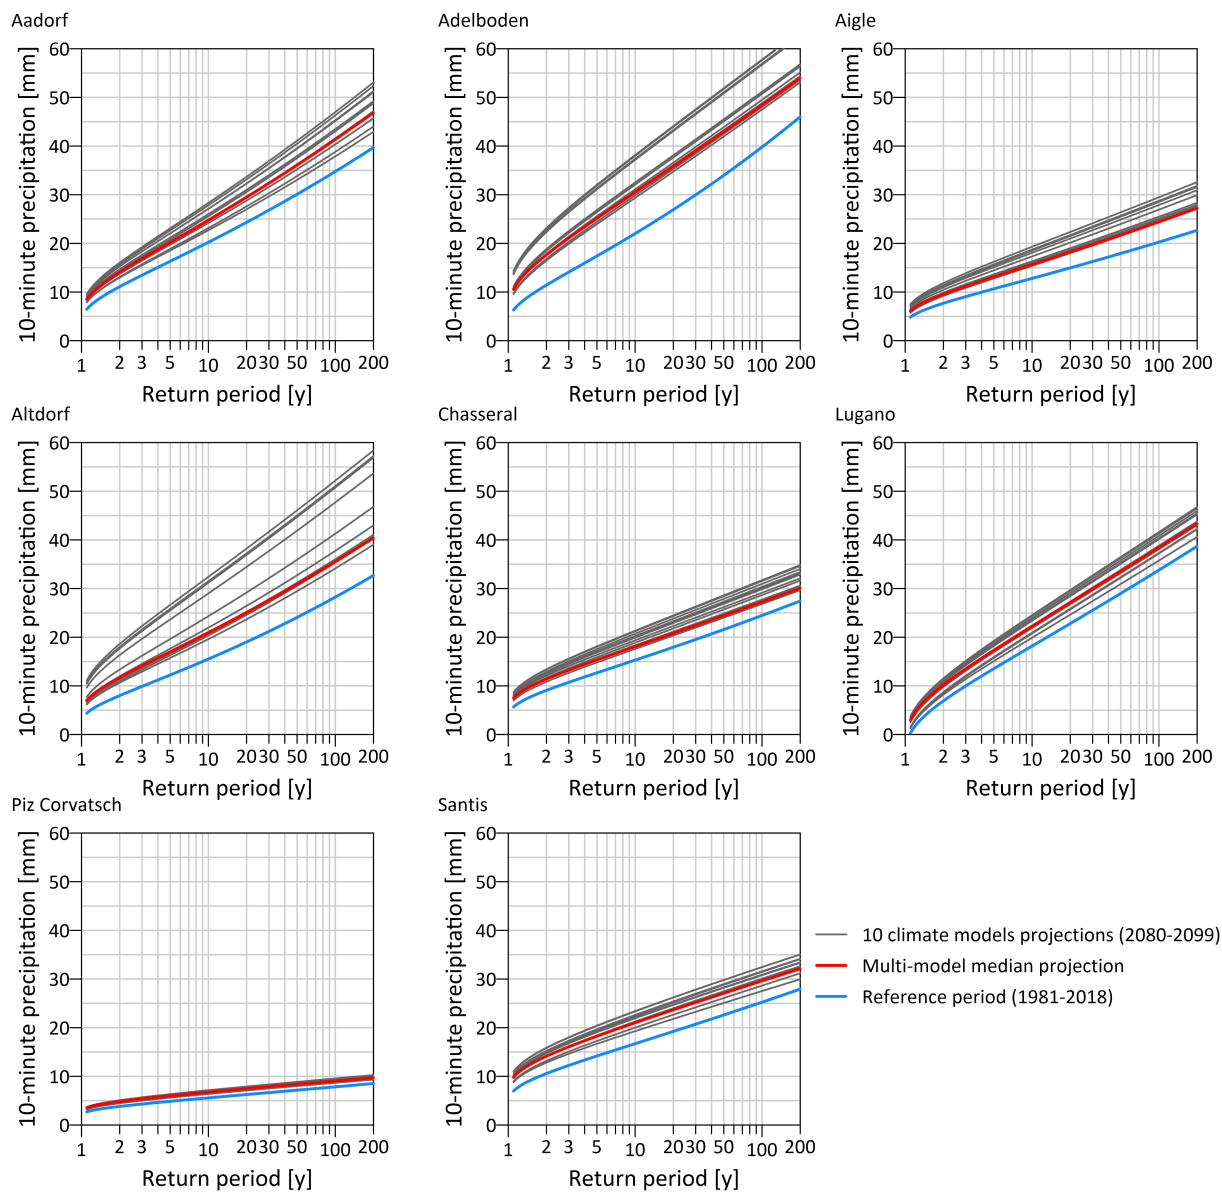

**Figure S3.** As Fig. 9 but for all 8 climate stations.
